# Supplementary material
Source: ML conference proceedings conference paper supplement (https://openreview.net/forum?id=_Srox2nVaZ4)

$n = 252, \kappa = 7$

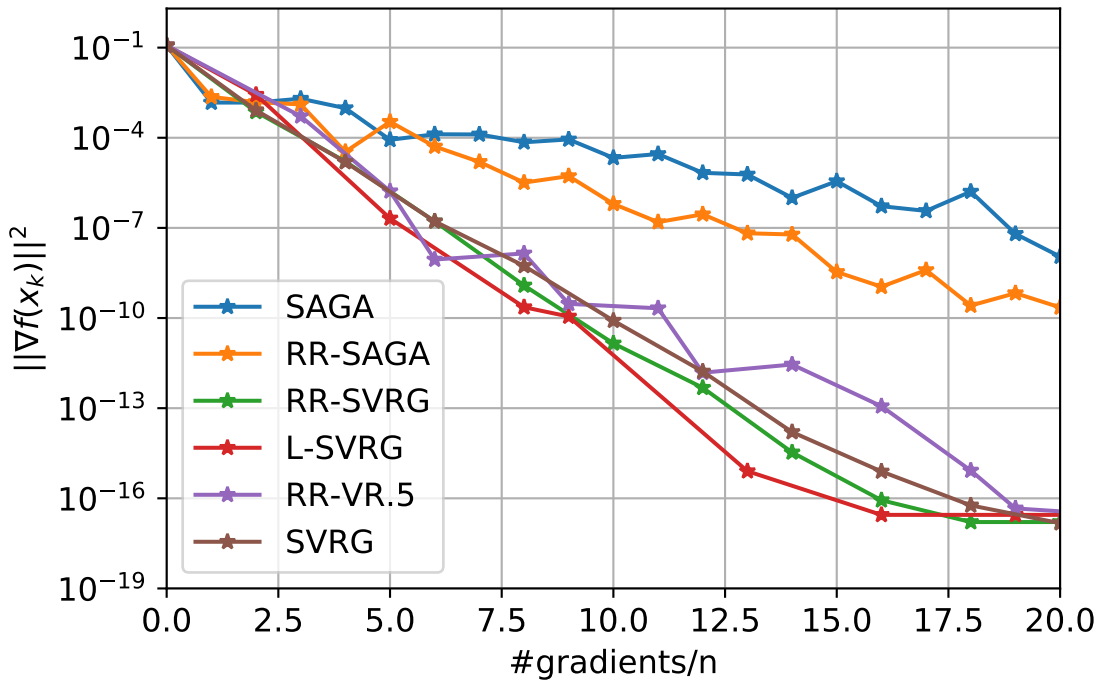

Supplement: supplementary_material [file attachment]

$n = 11055, \kappa = 11056$

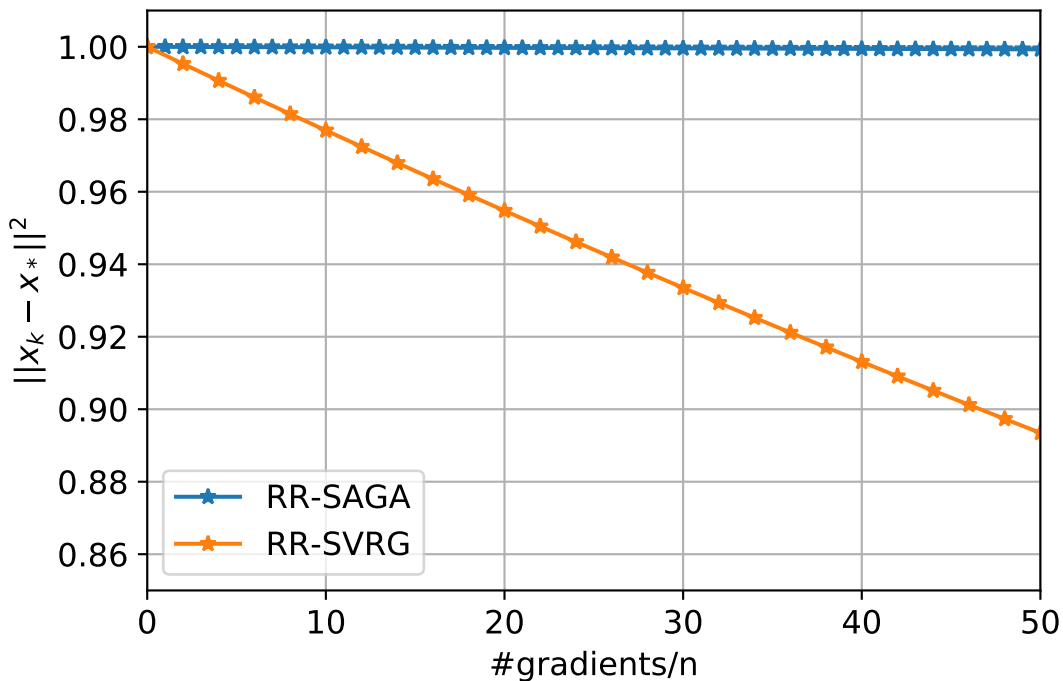

Supplement: supplementary_material [file attachment]

$n = 252, \kappa = 252$

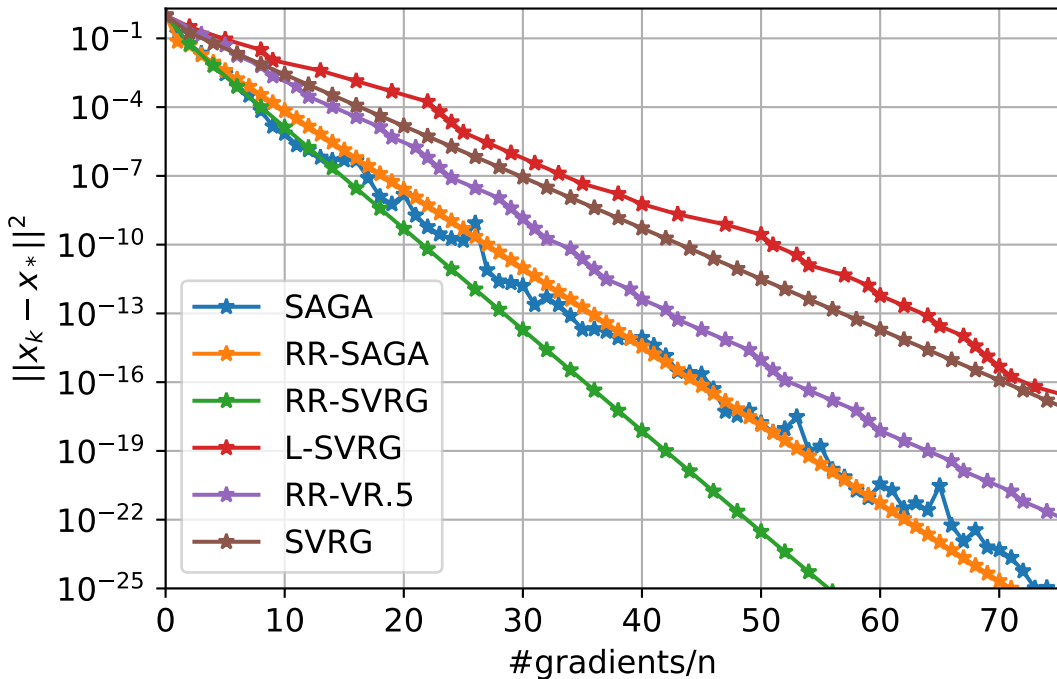

Supplement: supplementary_material [file attachment]

$n = 4177, \kappa = 1045$

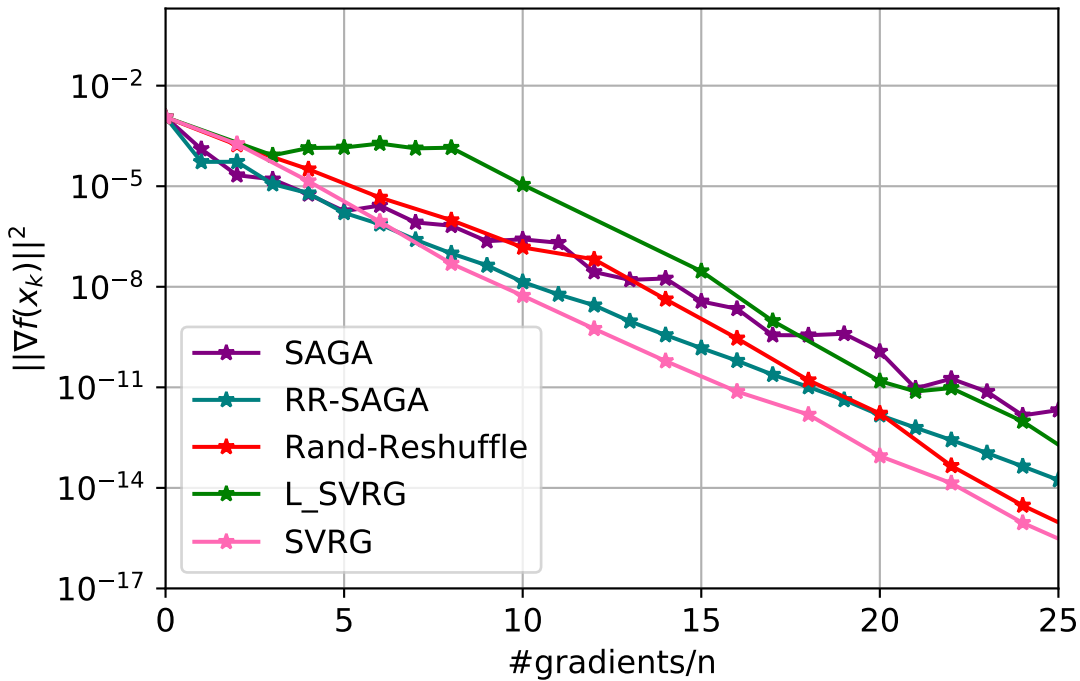

Supplement: supplementary_material [file attachment]

$n = 1605, \kappa = 161$

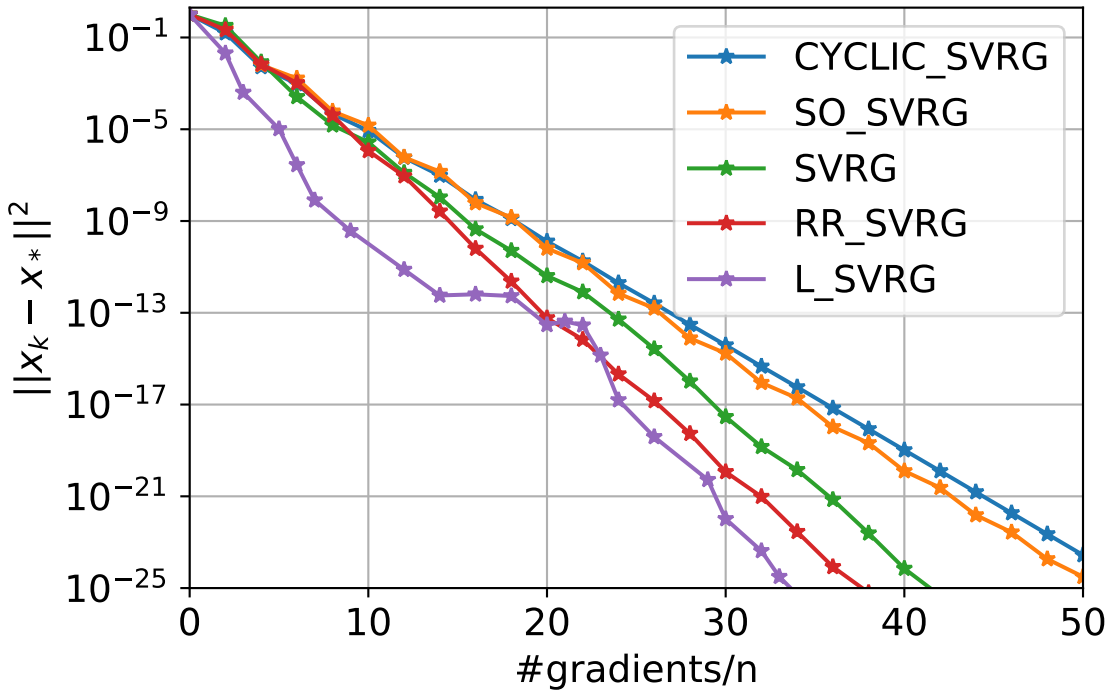

Supplement: supplementary_material [file attachment]

$n = 4177, \kappa = 413$

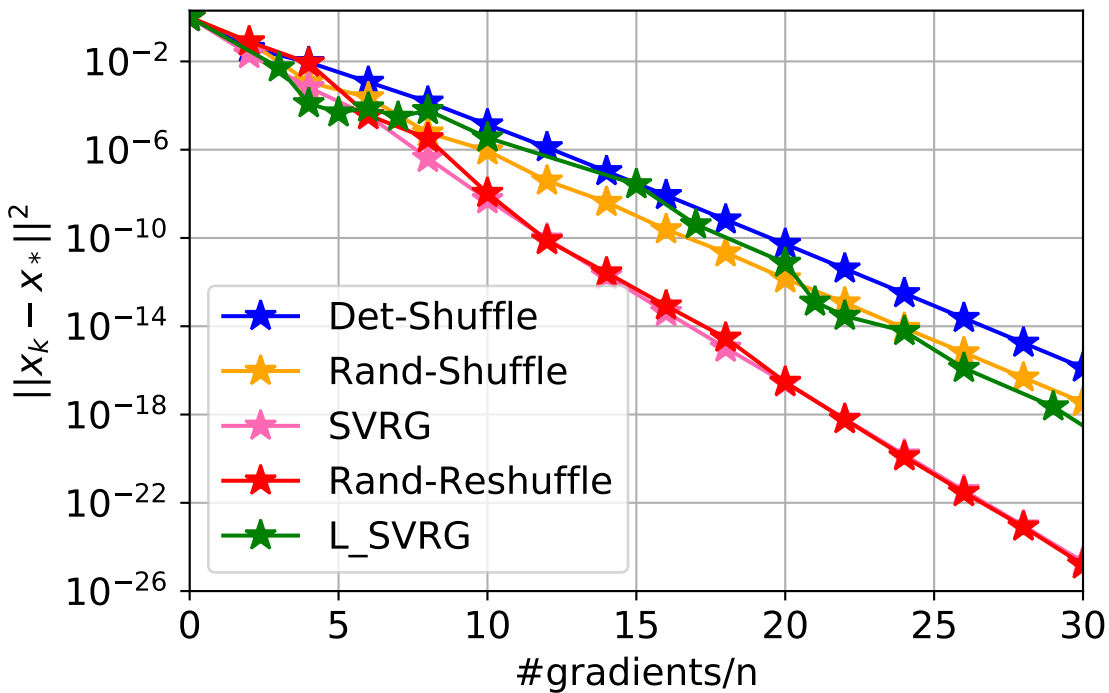

Supplement: supplementary_material [file attachment]

$n = 6414, \kappa = 1604$

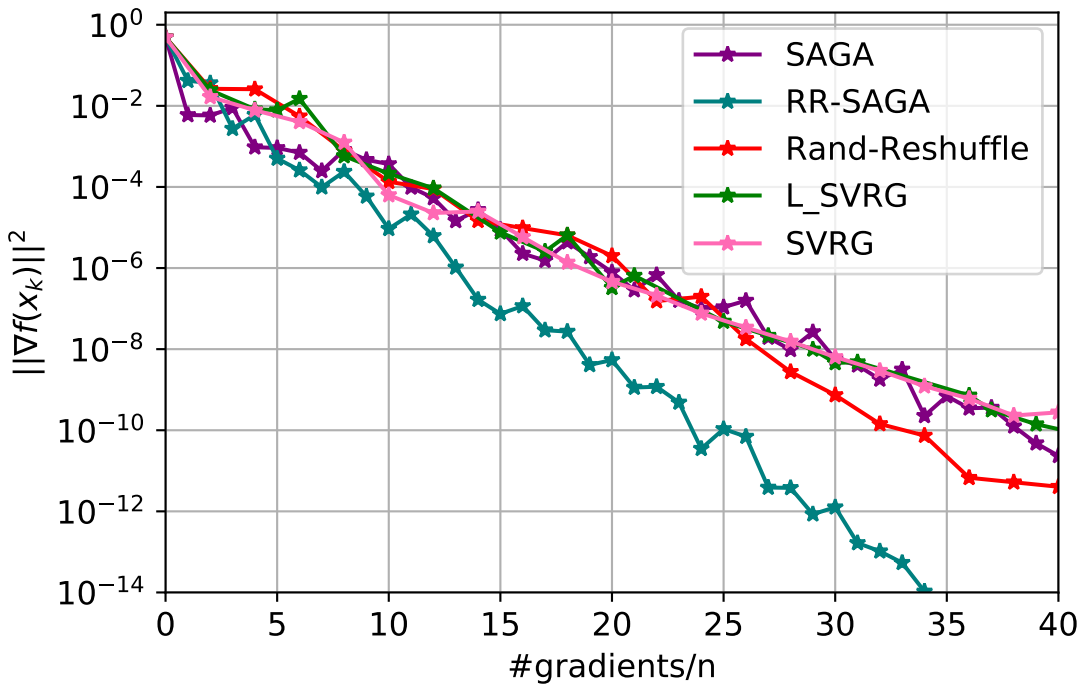

Supplement: supplementary_material [file attachment]

$n = 4177, \kappa = 6016$

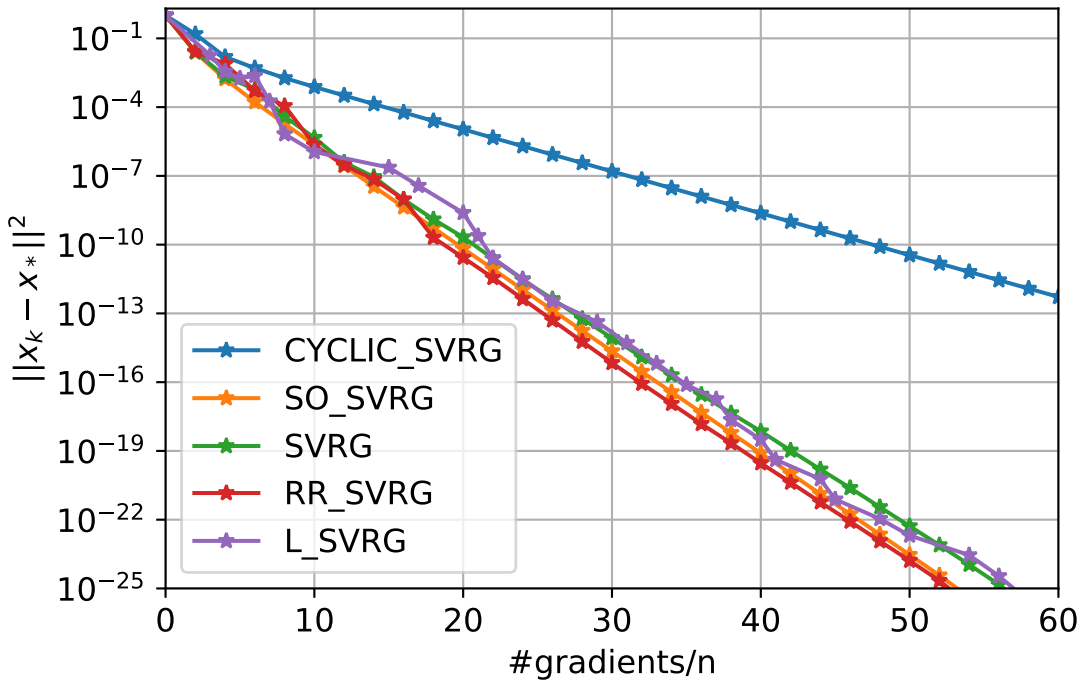

Supplement: supplementary_material [file attachment]

$n = 3185, \kappa = 797$

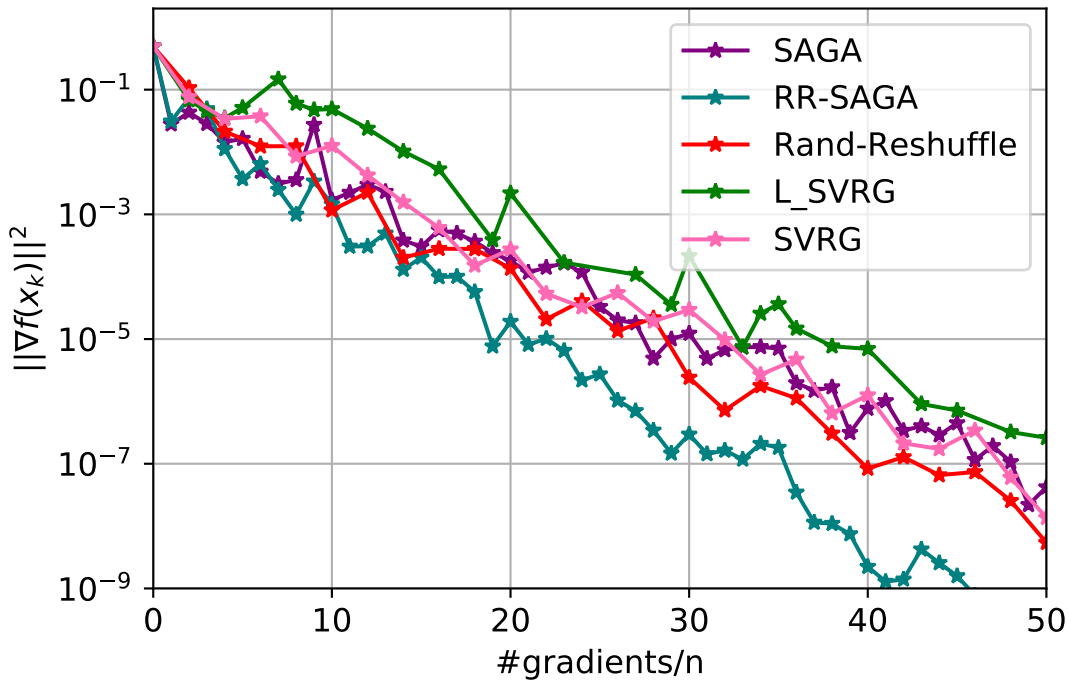

Supplement: supplementary_material [file attachment]

$n = 35000, \kappa = 459$

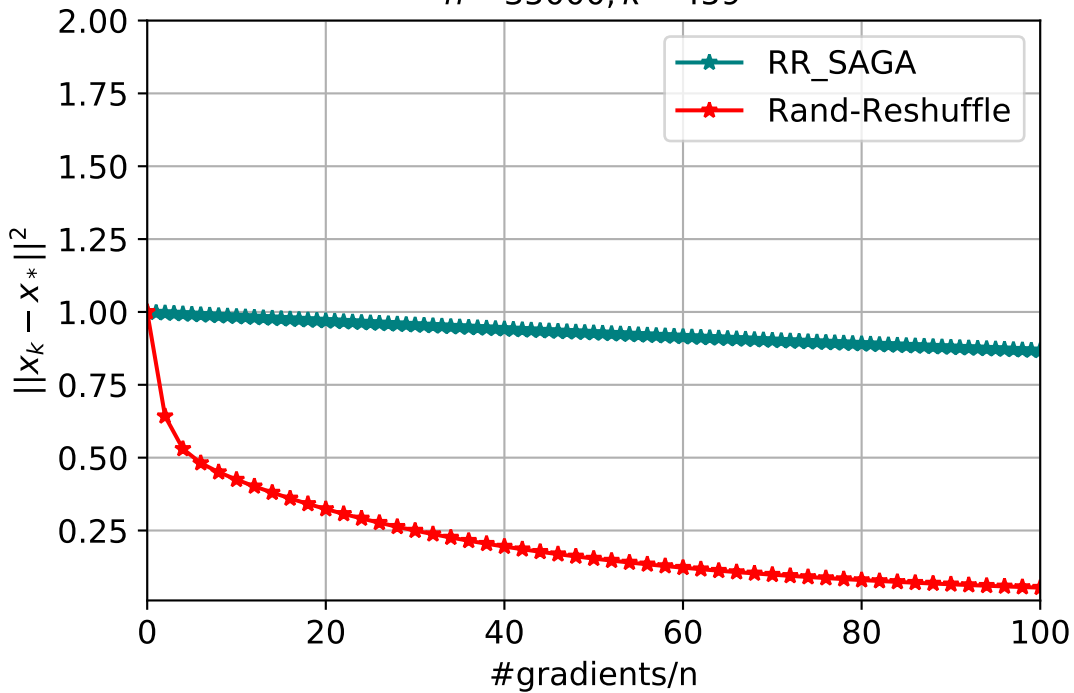

Supplement: supplementary_material [file attachment]

$n = 1605, \kappa = 161$

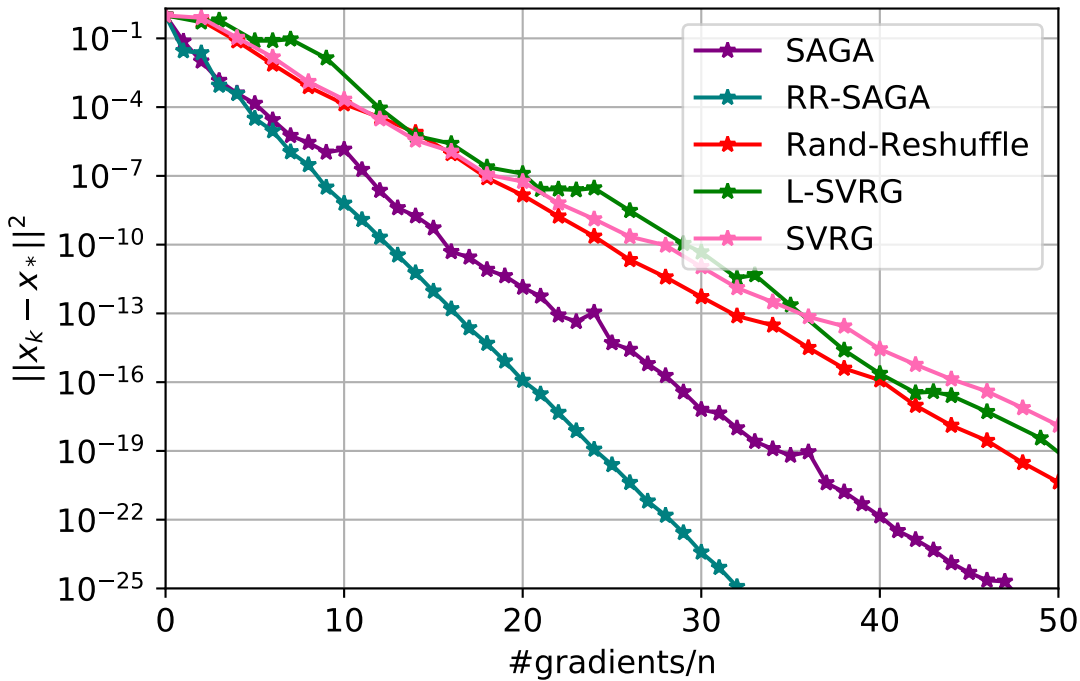

Supplement: supplementary_material [file attachment]

$n = 252, \kappa = 64$

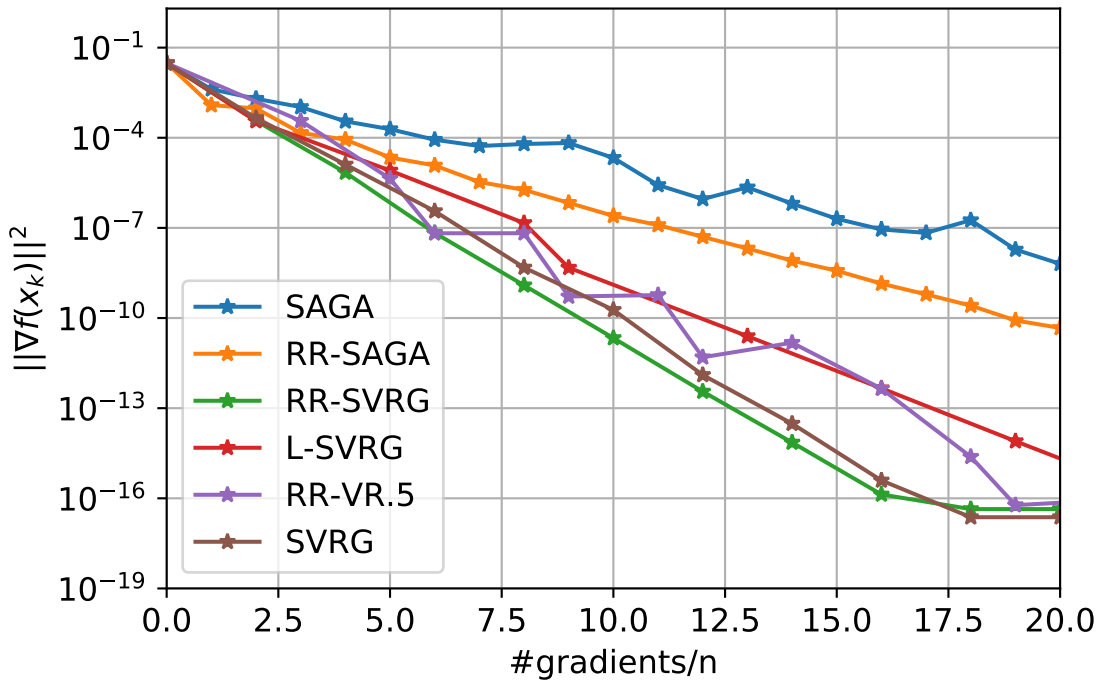

Supplement: supplementary_material [file attachment]

$n = 4177, \kappa = 17862$

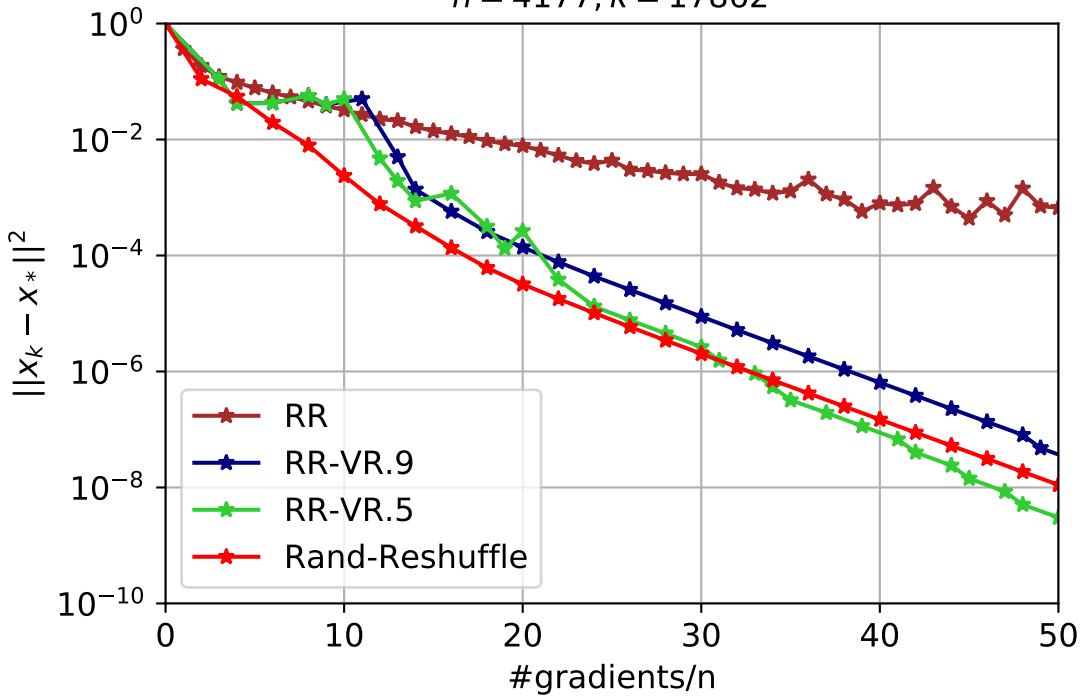

Supplement: supplementary_material [file attachment]

$n = 1605, \kappa = 1606$

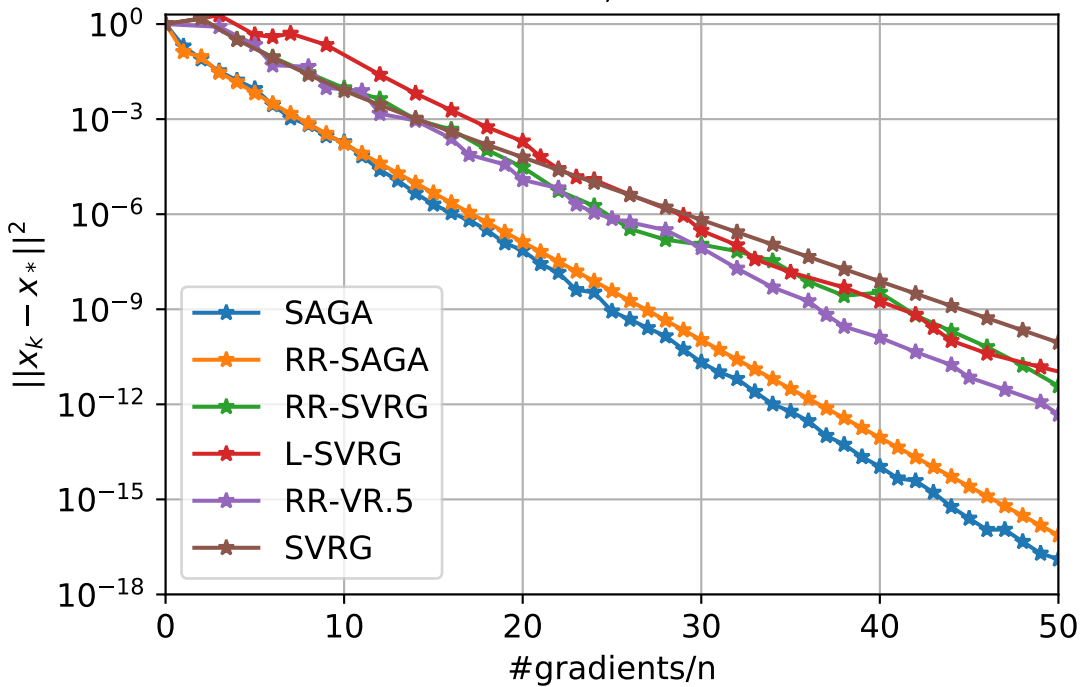

Supplement: supplementary_material [file attachment]

$n = 1605, \kappa = 161$

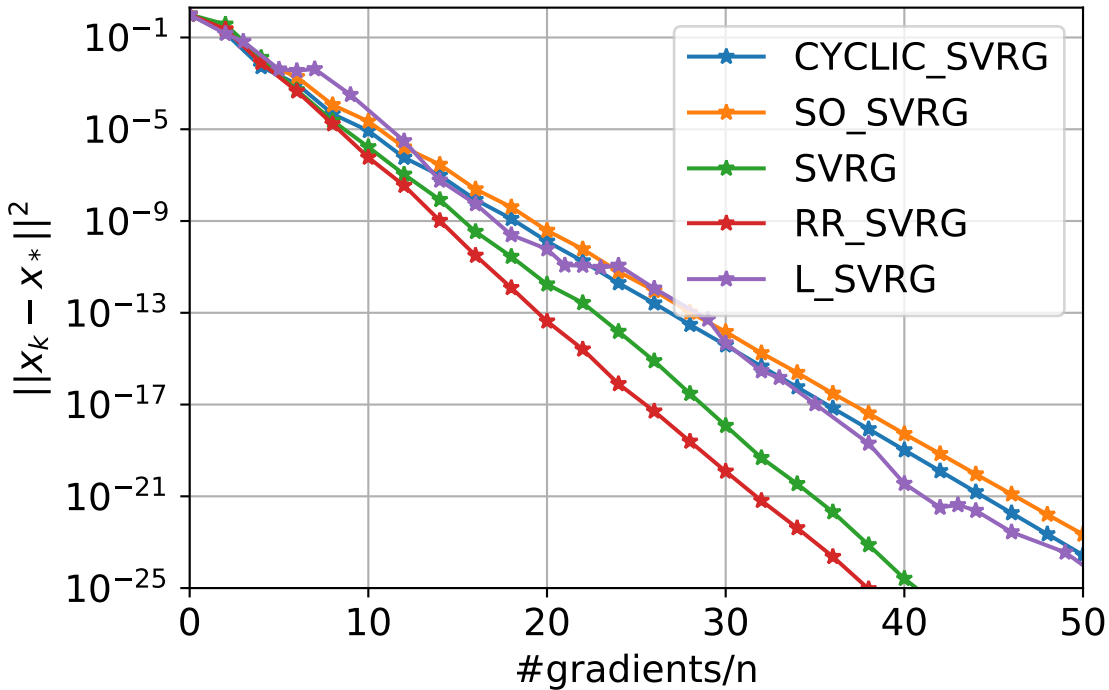

Supplement: supplementary_material [file attachment]

$n = 252, \kappa = 26$

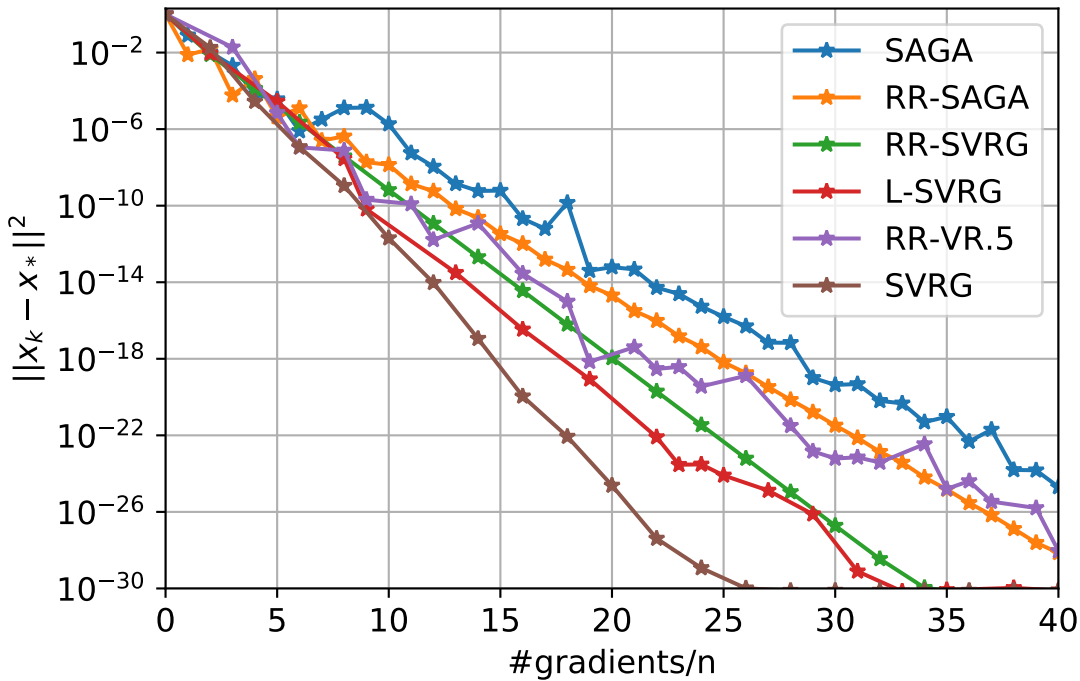

Supplement: supplementary_material [file attachment]

$n = 16100$

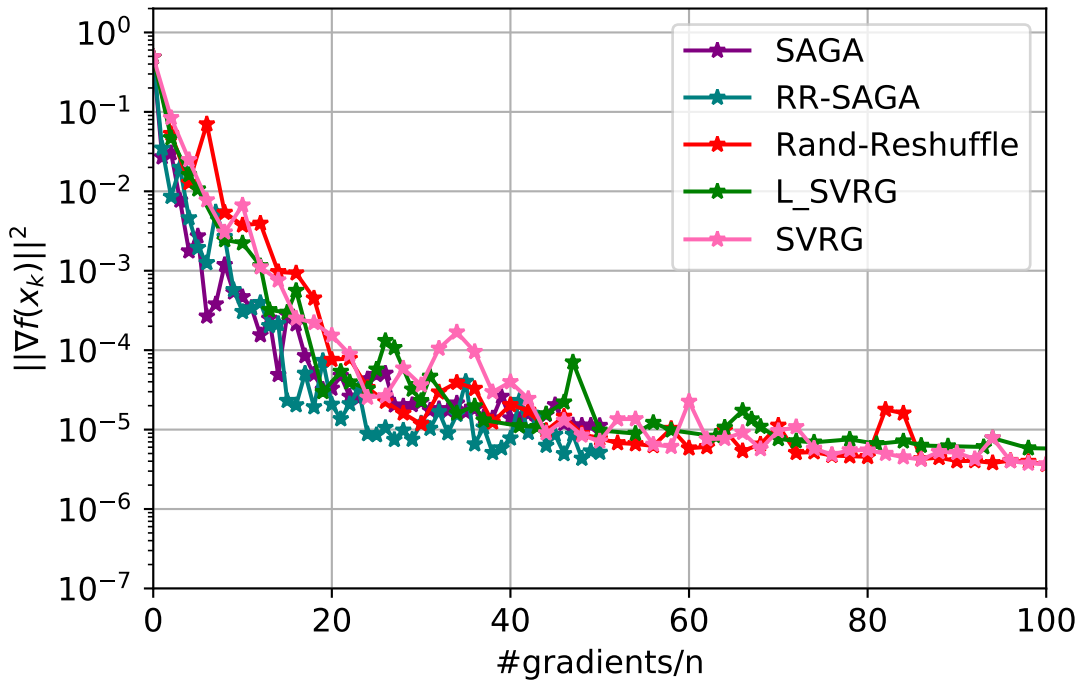

Supplement: supplementary_material [file attachment]

$n = 16100, \kappa = 1611$

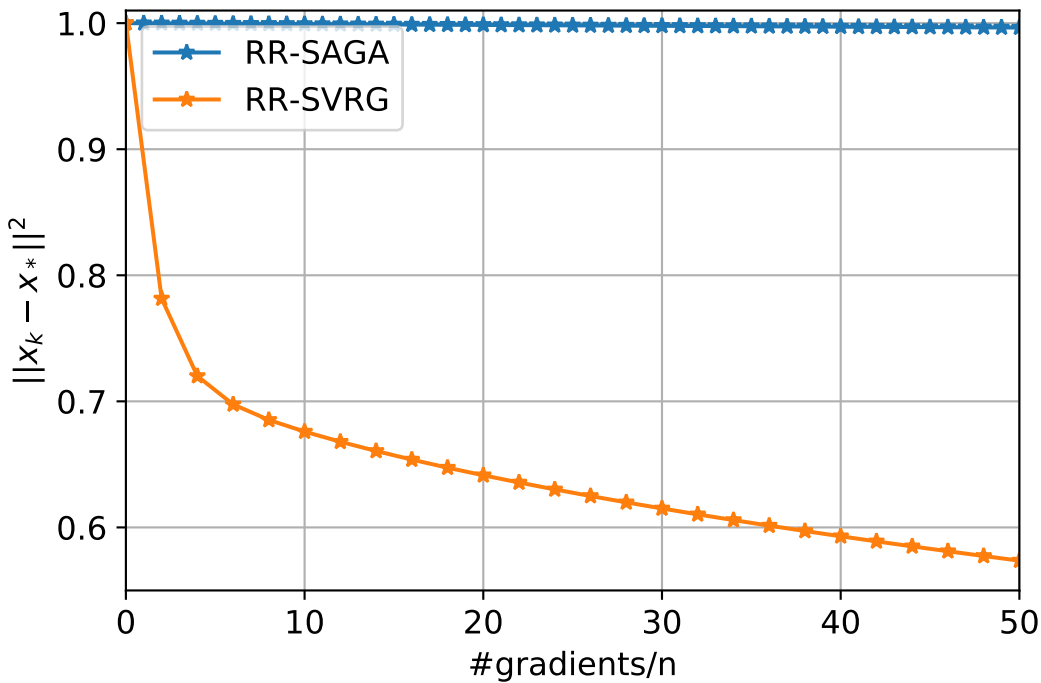

Supplement: supplementary_material [file attachment]

$n = 35000, \kappa = 459$

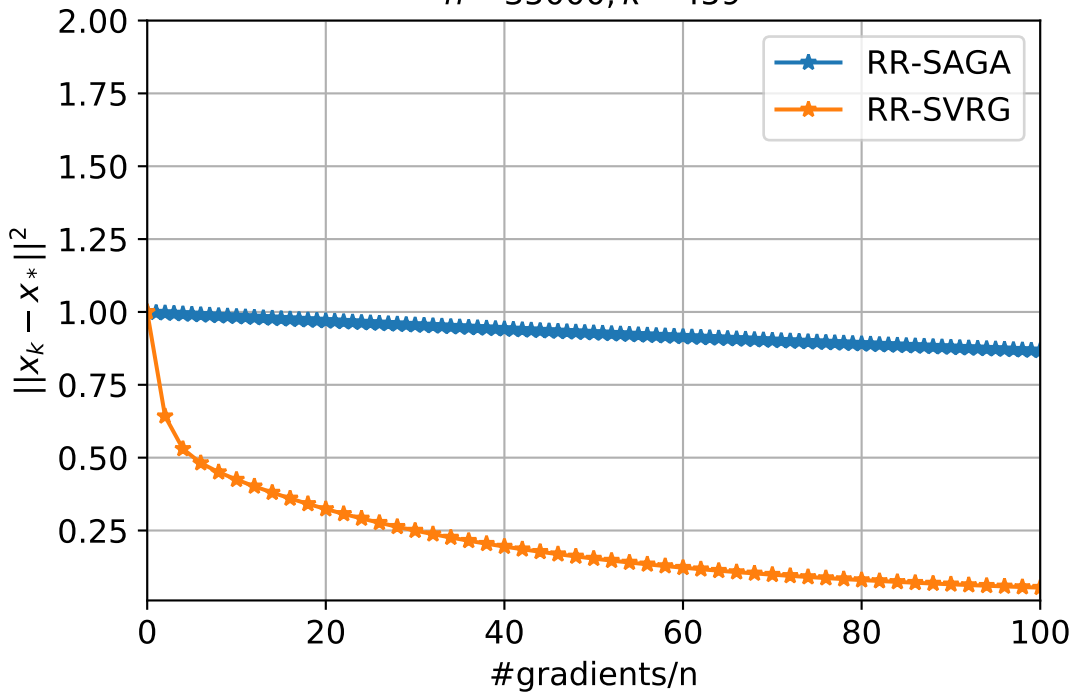

Supplement: supplementary_material [file attachment]

$n = 4177, \kappa = 3684$

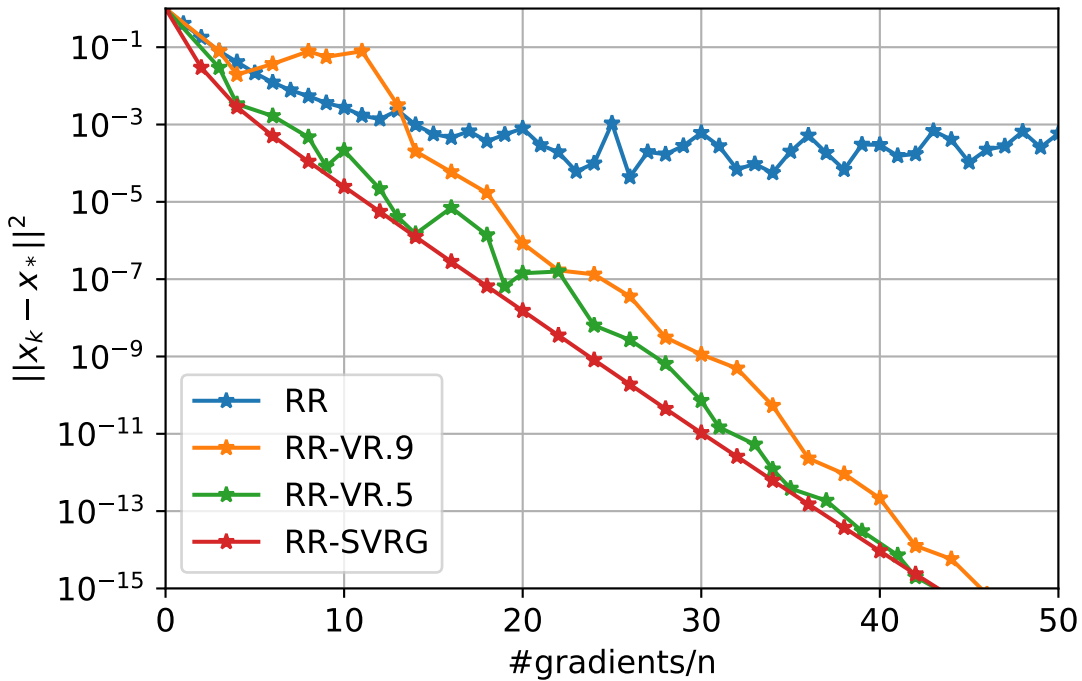

Supplement: supplementary_material [file attachment]

$n = 252, \kappa = 7$

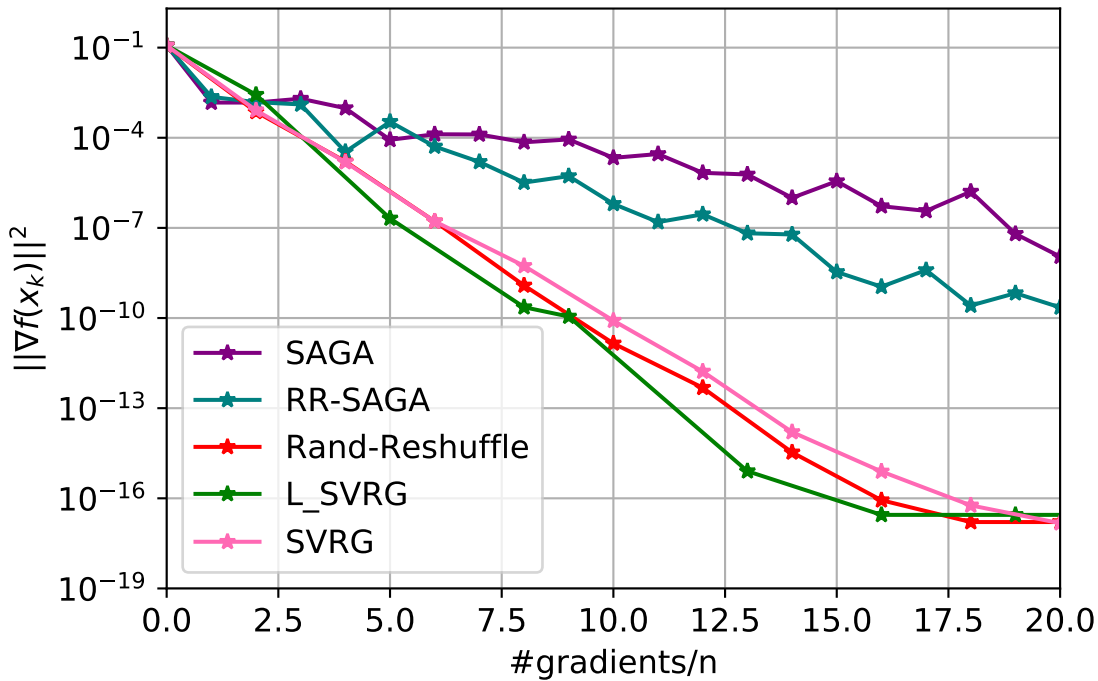

Supplement: supplementary_material [file attachment]

$n = 252, \kappa = 64$

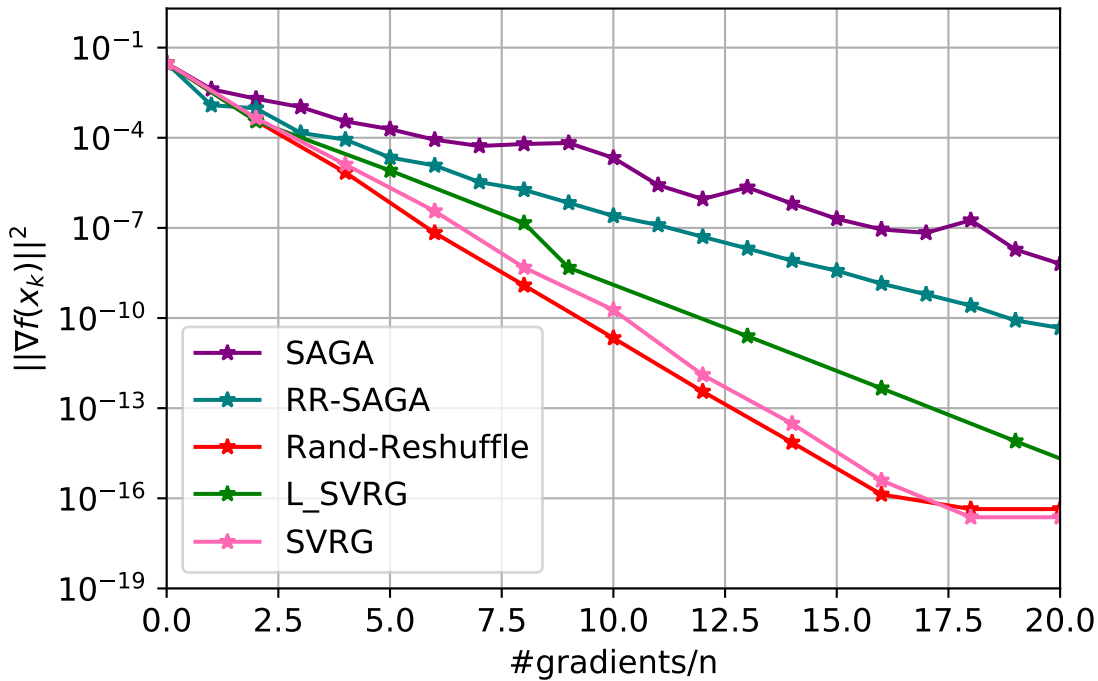

Supplement: supplementary_material [file attachment]

$n = 1605, \kappa = 161$

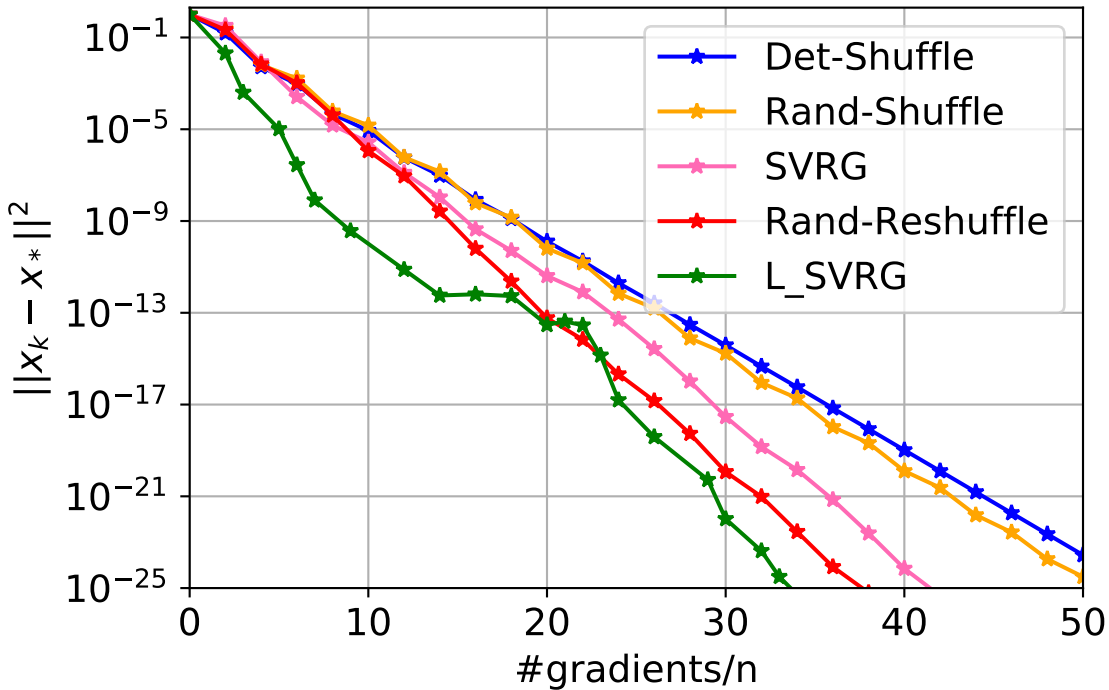

Supplement: supplementary_material [file attachment]

$n = 252, \kappa = 252$

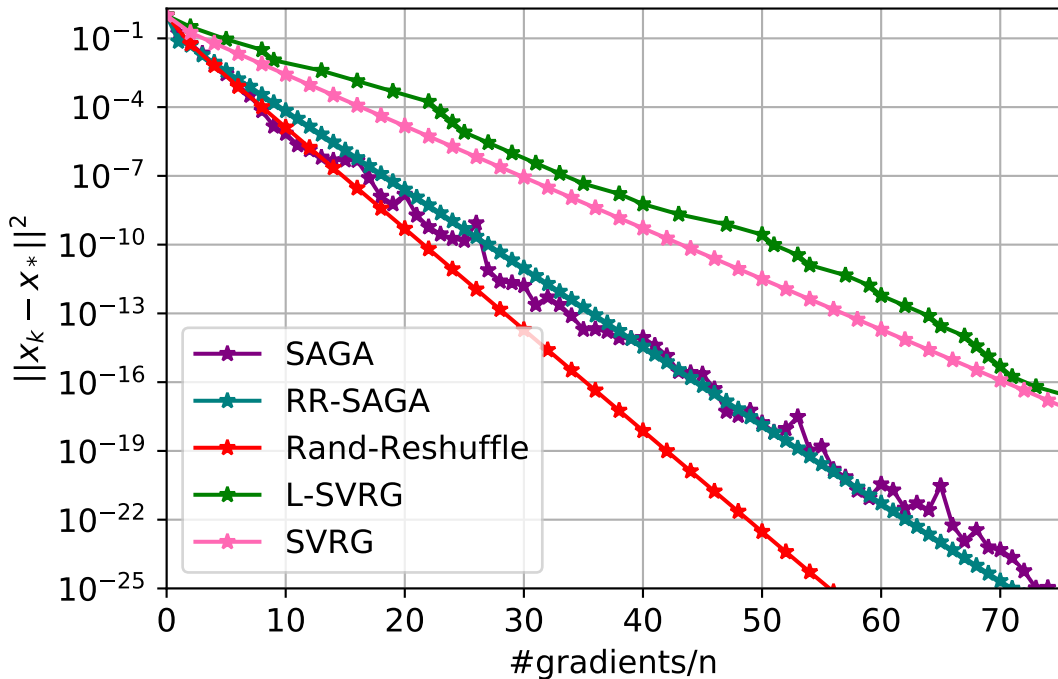

Supplement: supplementary_material [file attachment]

$n = 4177, \kappa = 6016$

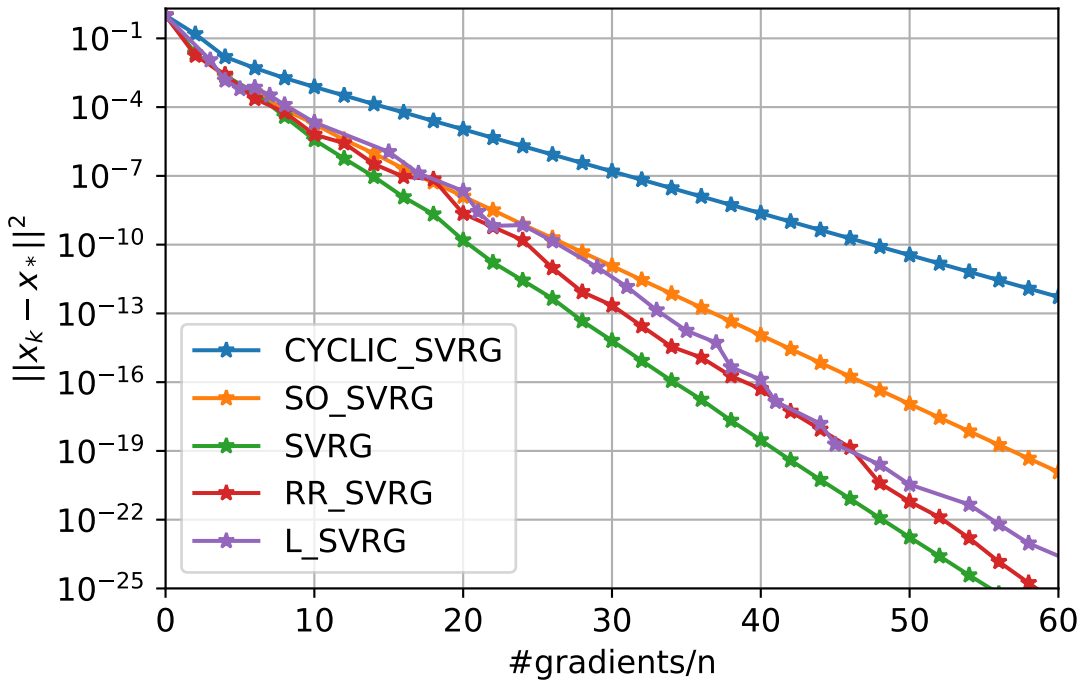

Supplement: supplementary_material [file attachment]

$n = 16100, \kappa = 1611$

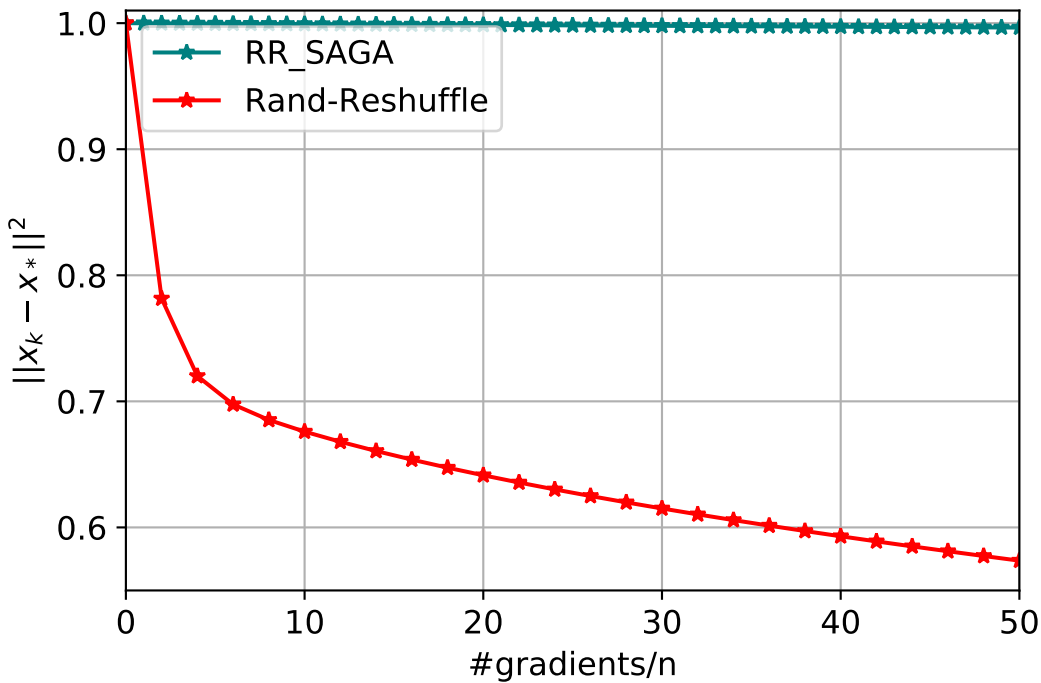

Supplement: supplementary_material [file attachment]

$n = 4177, \kappa = 413$

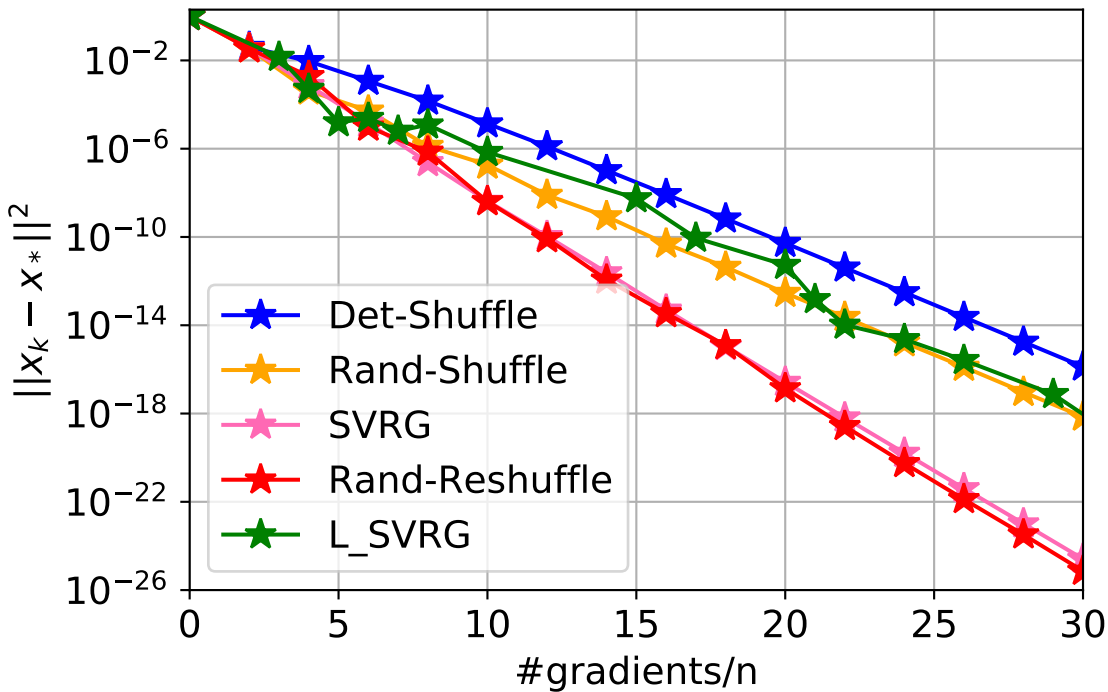

Supplement: supplementary_material [file attachment]

$n = 4177, \kappa = 17862$

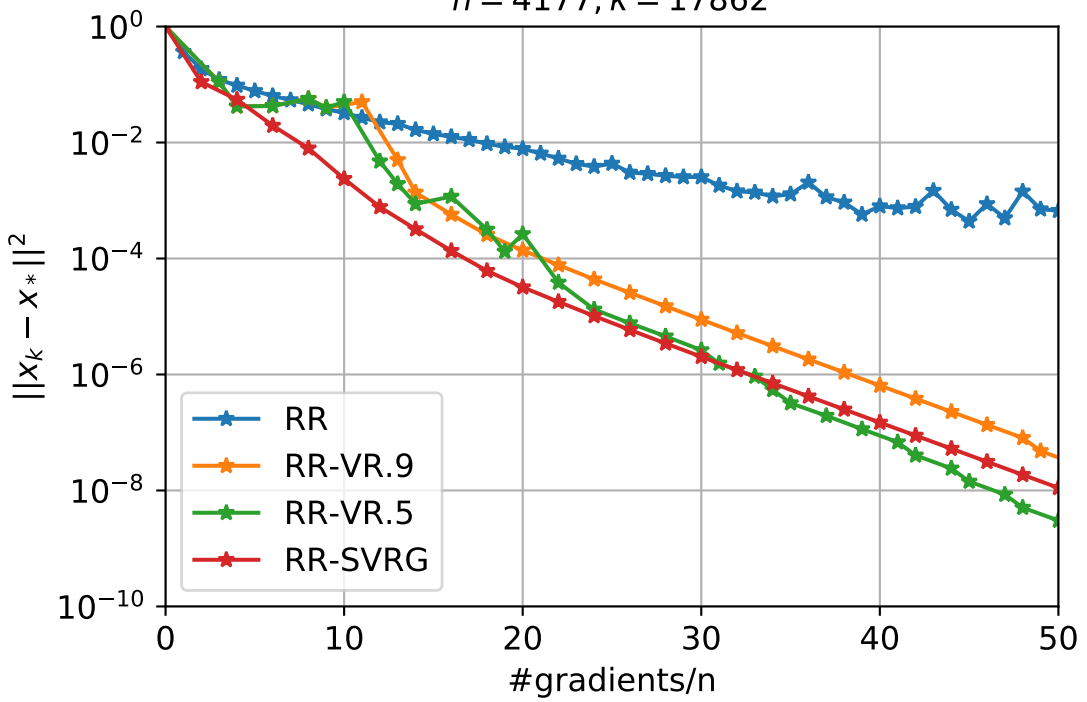

Supplement: supplementary_material [file attachment]

$n = 20640, \kappa = 2058$

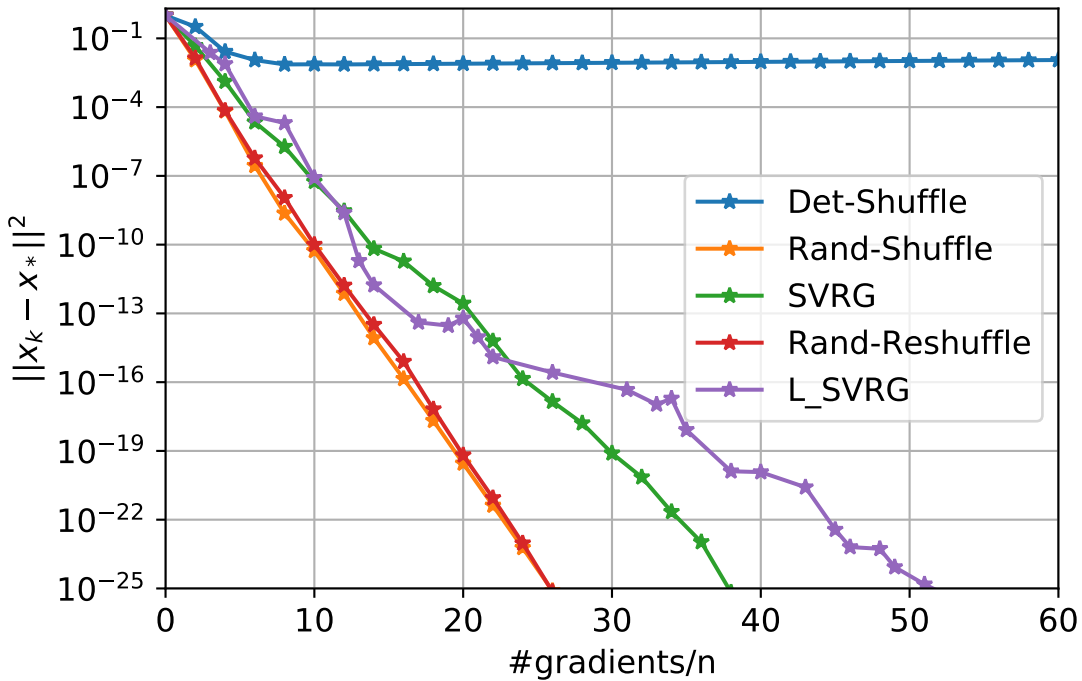

Supplement: supplementary_material [file attachment]

$n = 6414, \kappa = 1604$

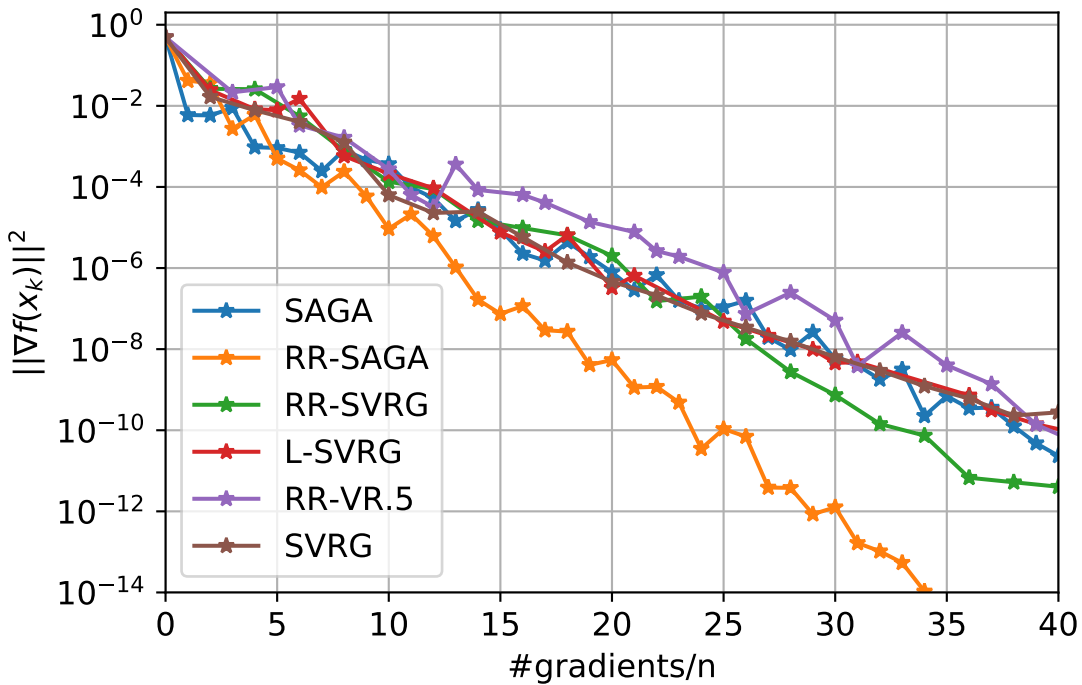

Supplement: supplementary_material [file attachment]

$n = 1605, \kappa = 402$

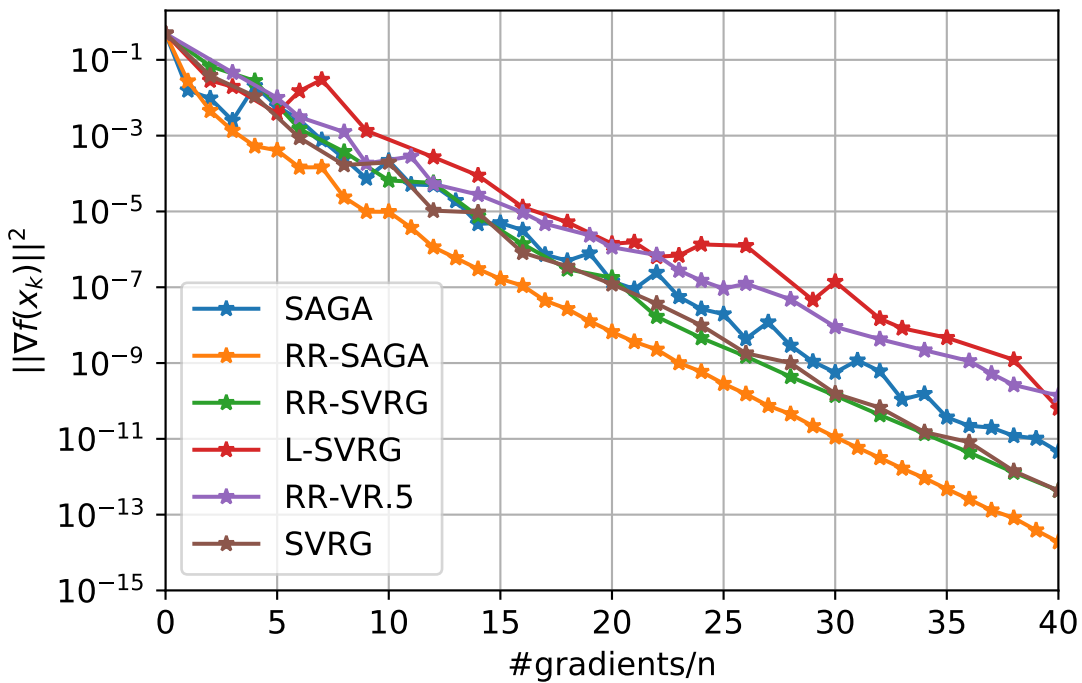

Supplement: supplementary_material [file attachment]

$n = 1605$

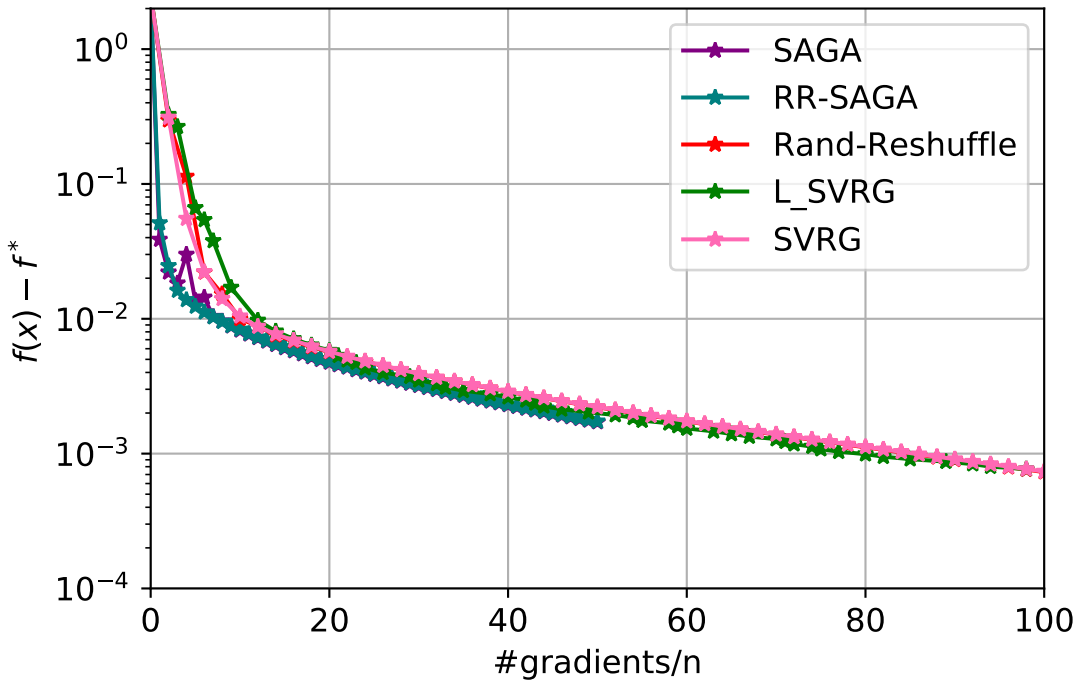

Supplement: supplementary_material [file attachment]

$n = 252, \kappa = 252$

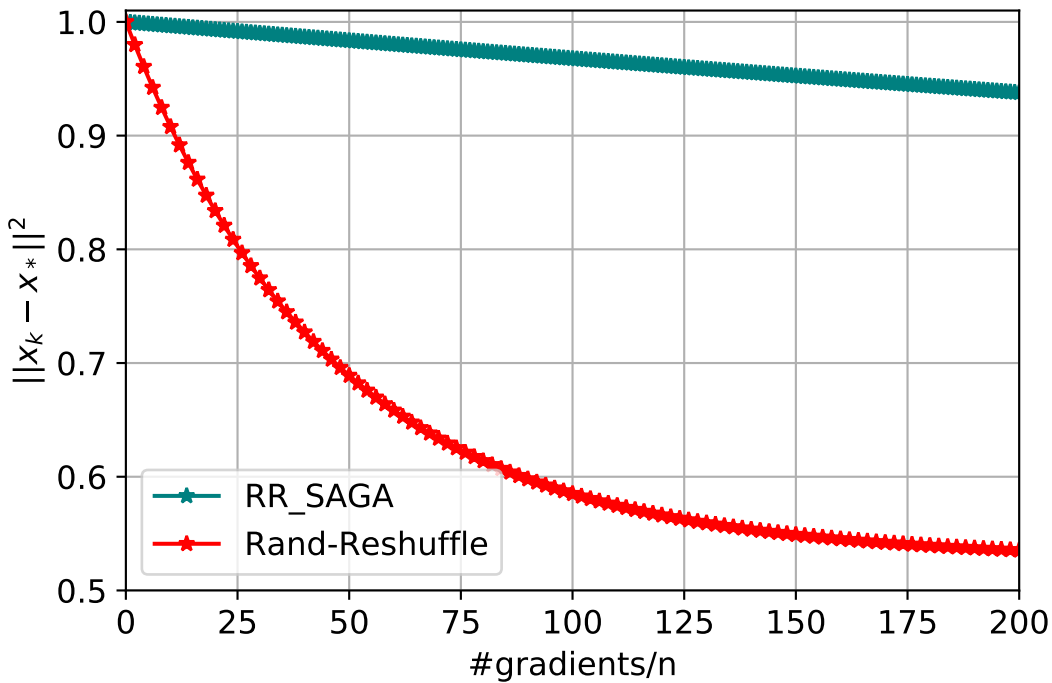

Supplement: supplementary_material [file attachment]

$n = 3185, \kappa = 797$

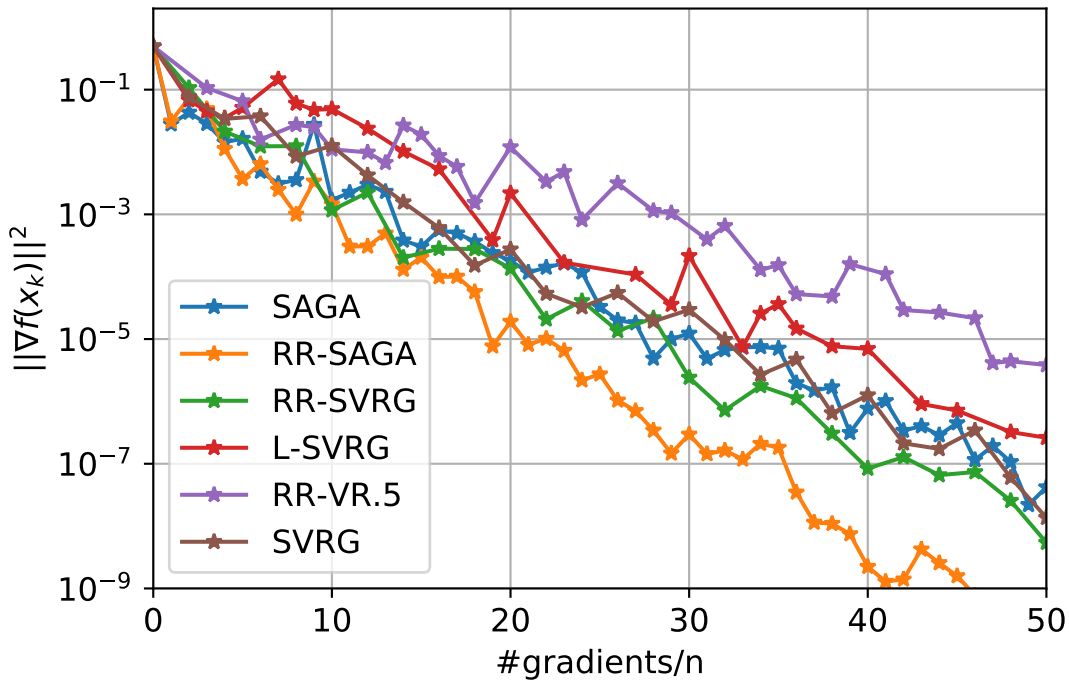

Supplement: supplementary_material [file attachment]

$n = 4177, \kappa = 1045$

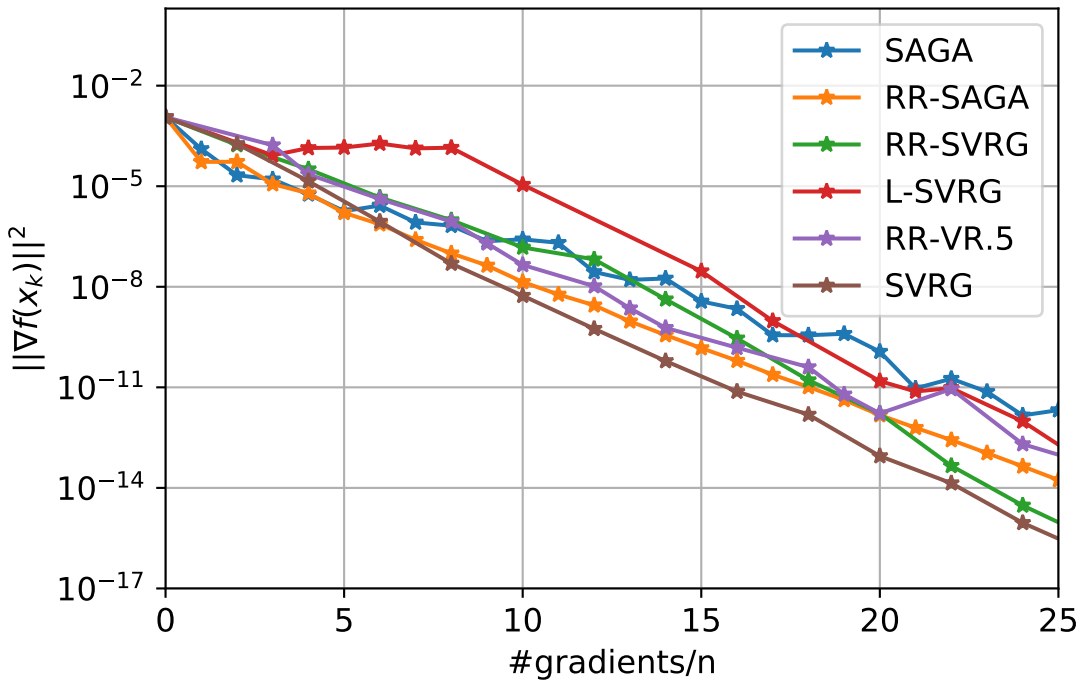

Supplement: supplementary_material [file attachment]

$n = 1605, \kappa = 161$

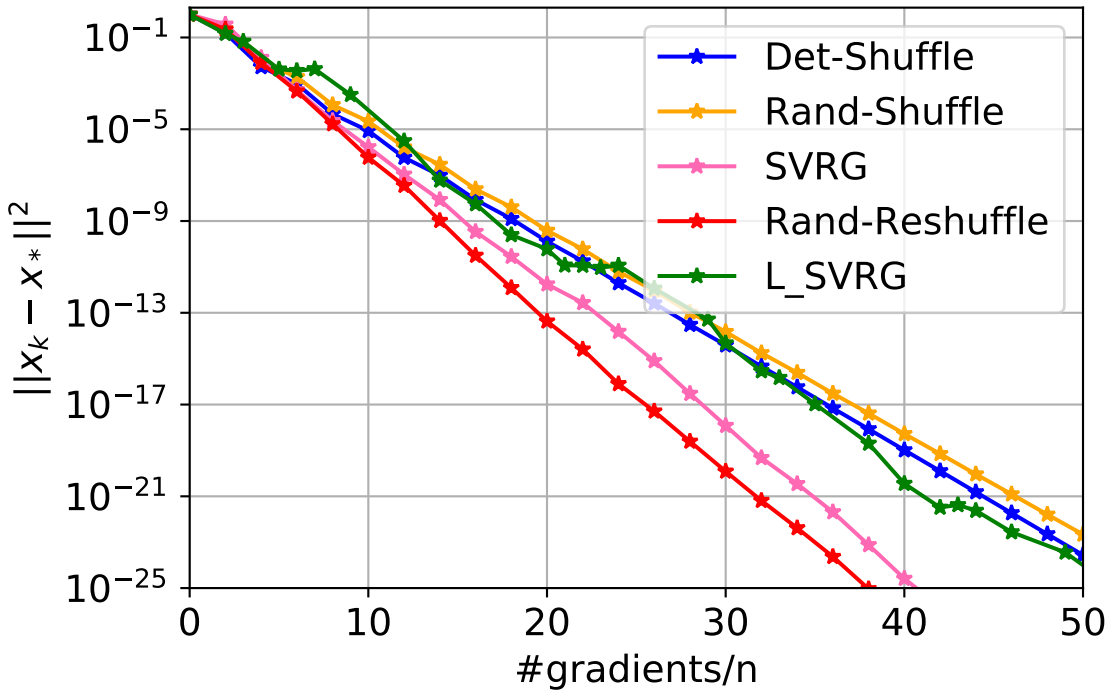

Supplement: supplementary_material [file attachment]

$n = 1605, \kappa = 161$

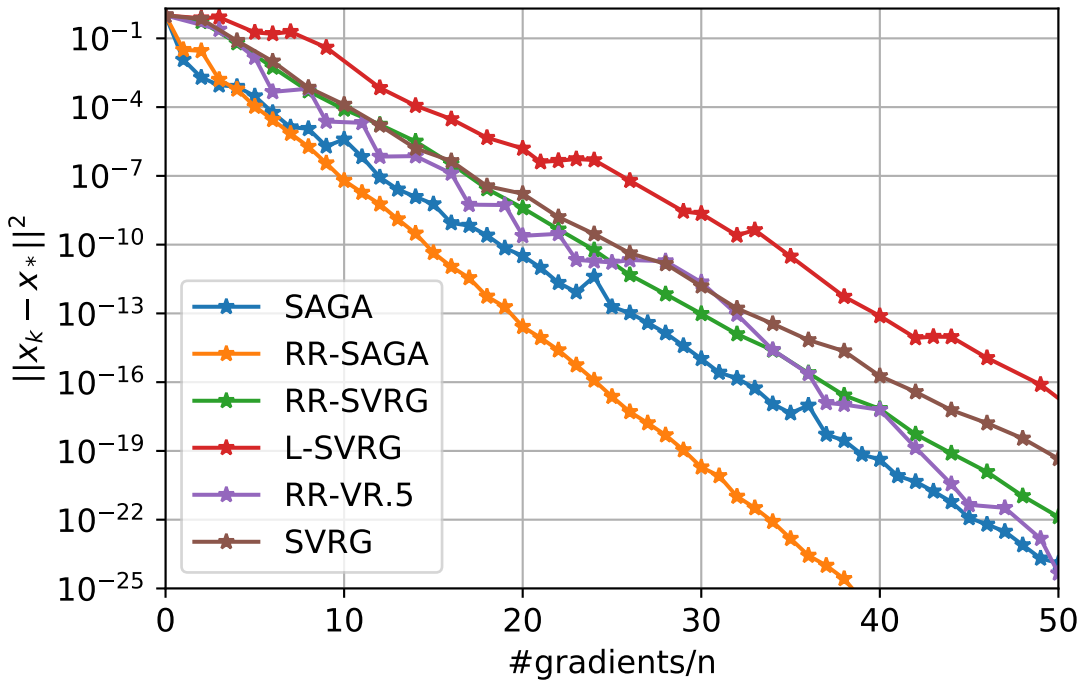

Supplement: supplementary_material [file attachment]

$n = 252, \kappa = 26$

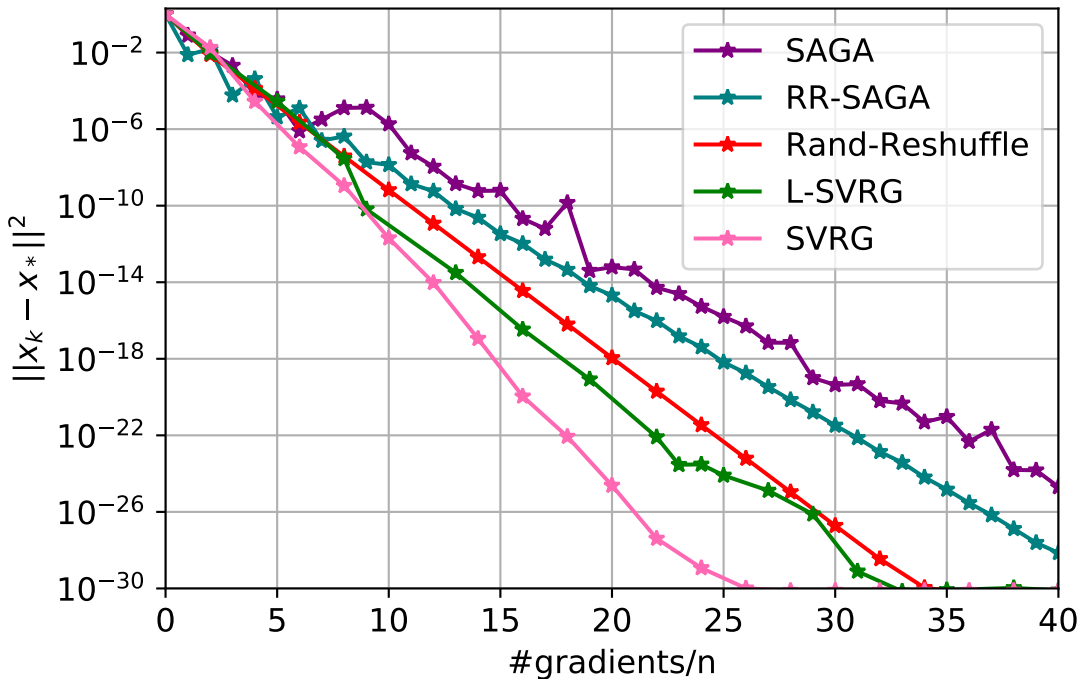

Supplement: supplementary_material [file attachment]

$n = 4177, \kappa = 413$

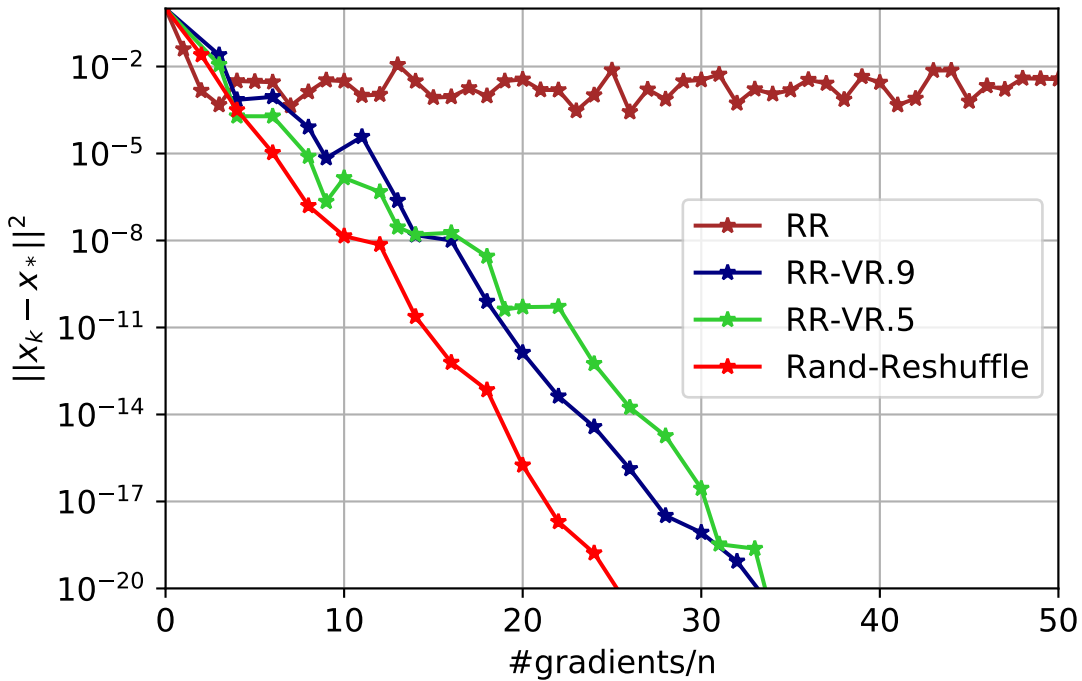

Supplement: supplementary_material [file attachment]

$n = 4177, \kappa = 3684$

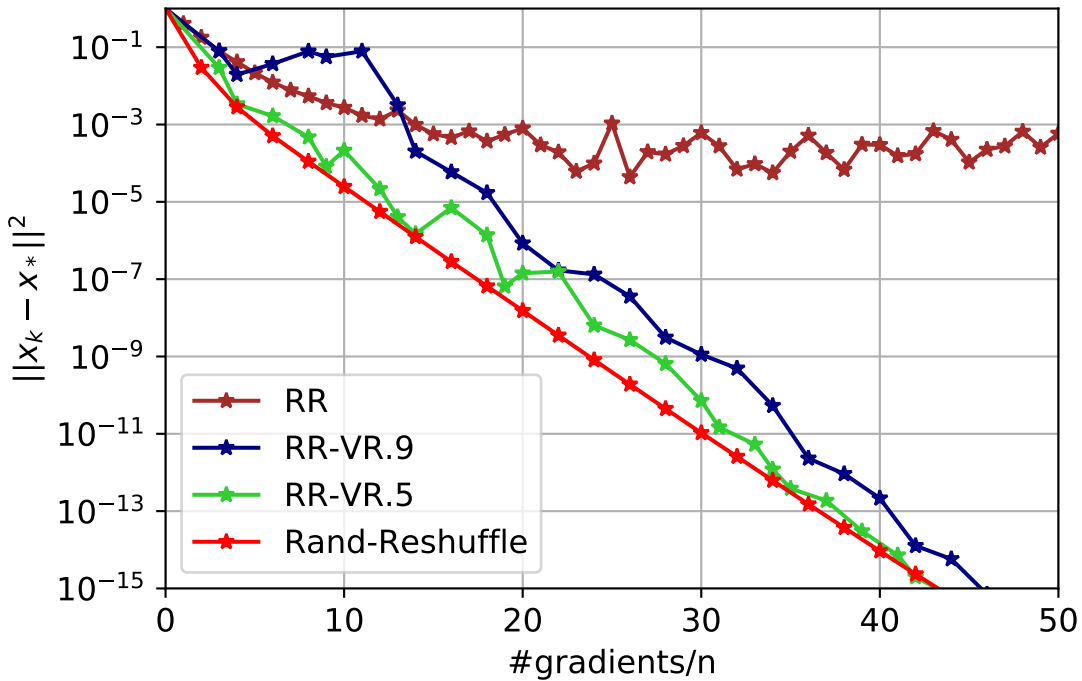

Supplement: supplementary_material [file attachment]

$n = 1605, \kappa = 402$

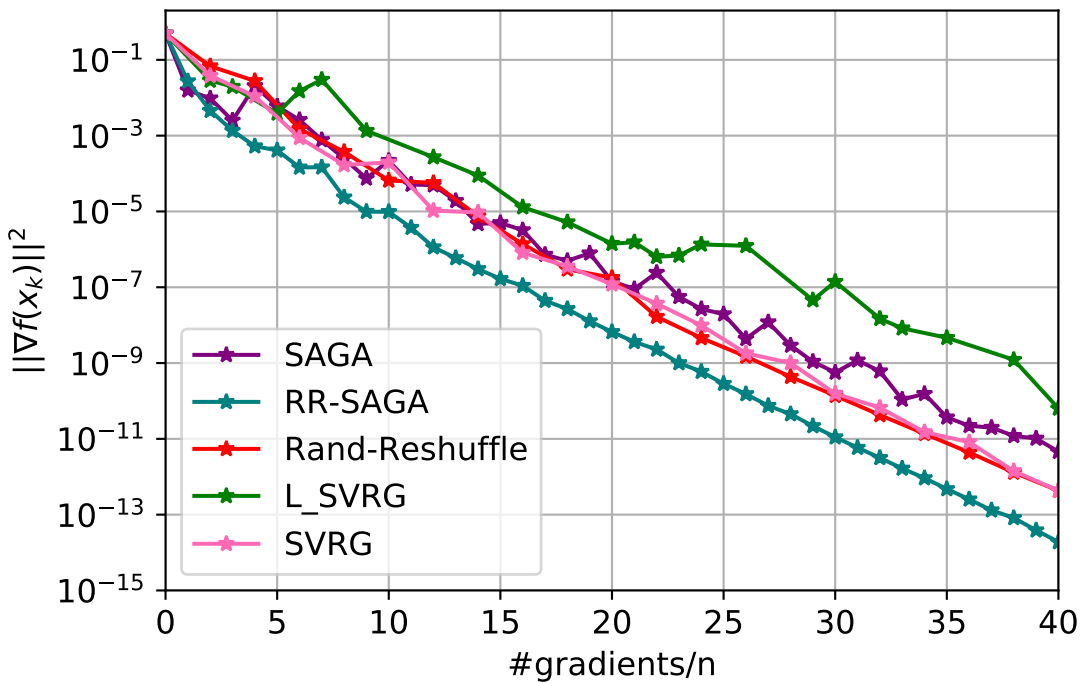

Supplement: supplementary_material [file attachment]

$n = 252, \kappa = 252$

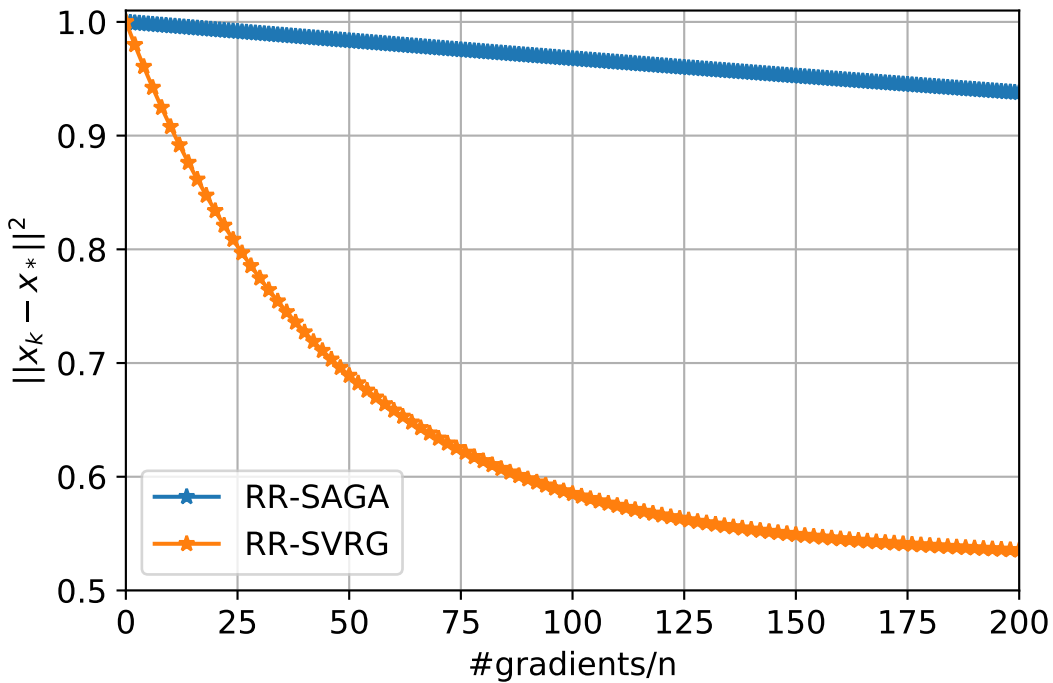

Supplement: supplementary_material [file attachment]

$n = 4177, \kappa = 413$

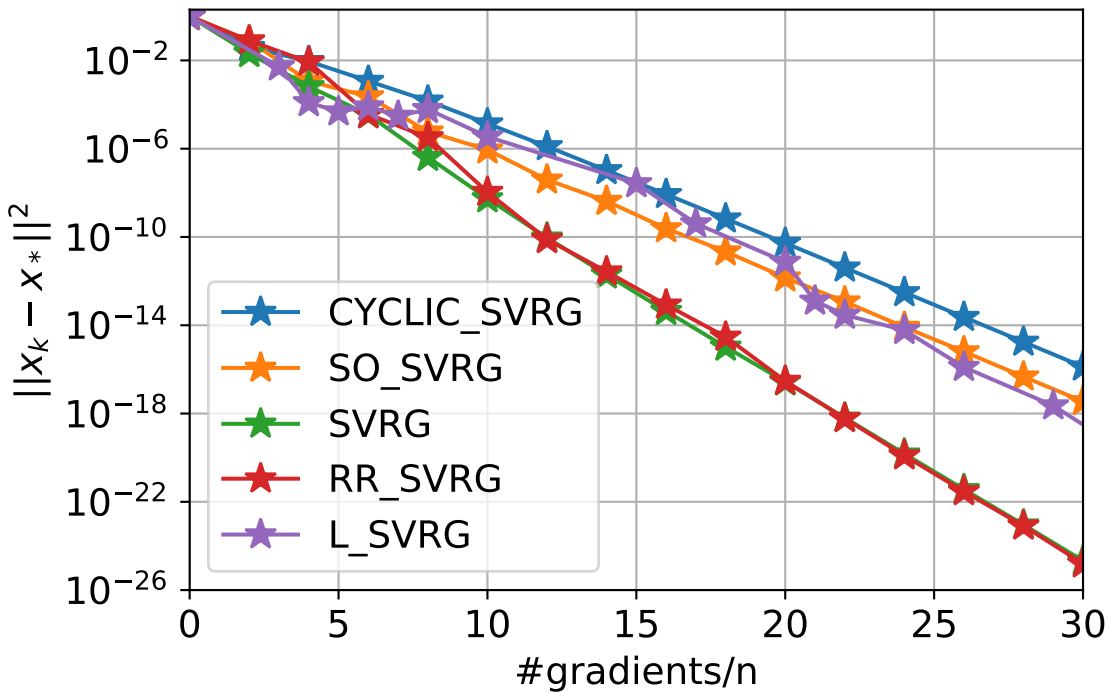

Supplement: supplementary_material [file attachment]

$n = 4177, \kappa = 413$

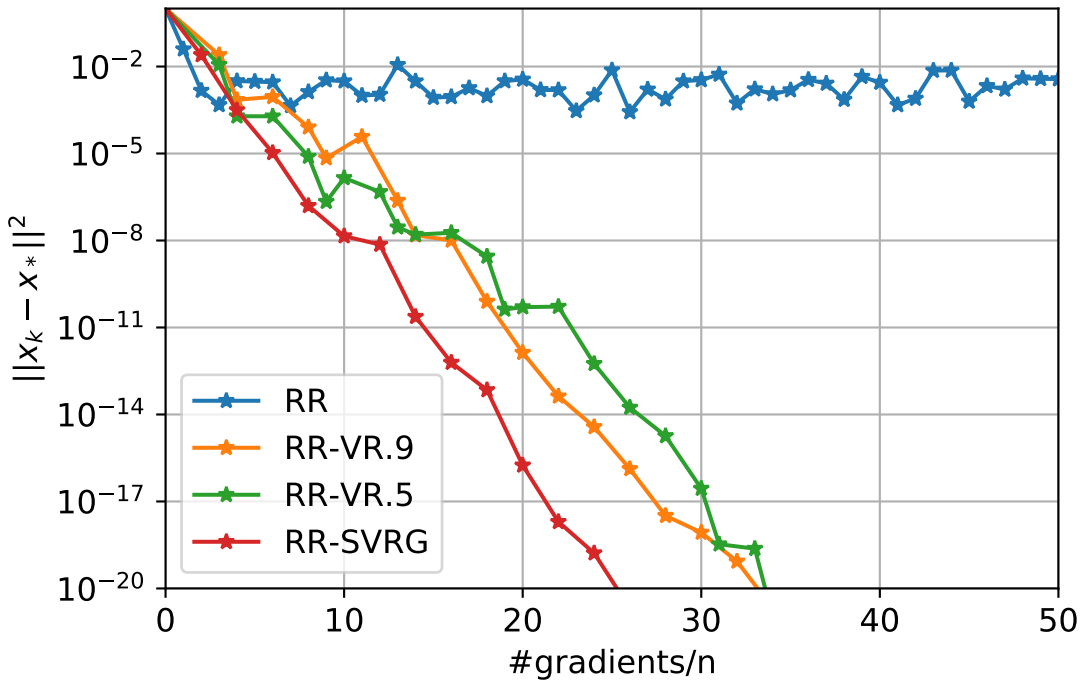

Supplement: supplementary_material [file attachment]

$n = 4177, \kappa = 413$

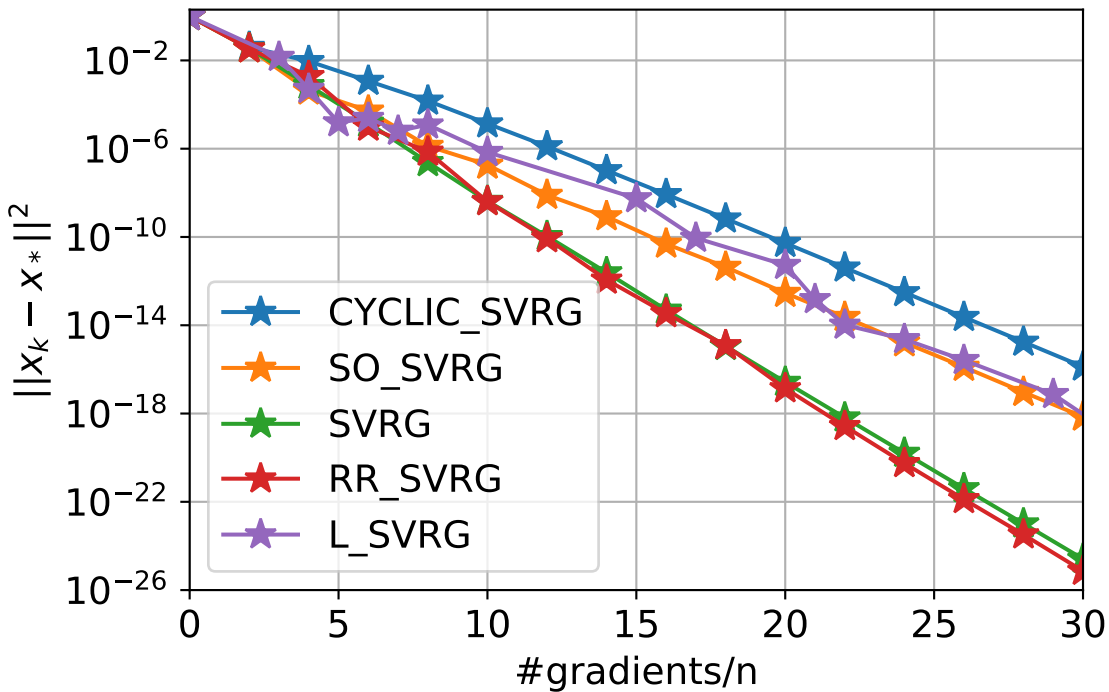

Supplement: supplementary_material [file attachment]
